# Supplementary material for: Tuning quantum tunnelling of magnetization through 3d–4f magnetic interactions: an alternative approach for manipulating single-molecule magnetism
Source: Royal Society of Chemistry journal article supplement (doi:10.1039/c6qi00407e), 2016-11-03
Supplement: c6qi00407e1.pdf [file c6qi00407e1.pdf]

## Supporting Information

### Tuning Quantum Tunnelling of Magnetization through 3d-4f Magnetic Interaction: the Alternative Approach for Manipulating Single-molecule Magnetism

Jing Li,<sup>a</sup> Rong-Min Wei,<sup>a</sup> Tian-Cheng Pu,<sup>c</sup> Fan Cao,<sup>a</sup> Li Yang,<sup>a</sup> Yuan Han,<sup>a</sup> Yi-Quan Zhang,<sup>\*b</sup> Jing-Lin Zuo,<sup>\*a</sup> and You Song<sup>\*a</sup>

**Table S1.** Crystallographic data for complexes **1-3**.

|                                                | <b>1</b>                                                                                       | <b>2</b>                                                                                       | <b>3</b>                                                                                        |
|------------------------------------------------|------------------------------------------------------------------------------------------------|------------------------------------------------------------------------------------------------|-------------------------------------------------------------------------------------------------|
| Formula                                        | C <sub>62</sub> H <sub>60</sub> Dy <sub>2</sub> N <sub>6</sub> O <sub>20</sub> Zn <sub>2</sub> | C <sub>66</sub> H <sub>66</sub> Dy <sub>2</sub> Mn <sub>2</sub> N <sub>8</sub> O <sub>20</sub> | C <sub>78</sub> H <sub>94</sub> Co <sub>2</sub> Dy <sub>2</sub> N <sub>12</sub> O <sub>24</sub> |
| <i>Mr</i> [g mol <sup>-1</sup> ]               | 1664.90                                                                                        | 1726.15                                                                                        | 2026.51                                                                                         |
| Crystal system                                 | Triclinic                                                                                      | Monoclinic                                                                                     | Triclinic                                                                                       |
| Space group                                    | <i>P</i> $\bar{1}$                                                                             | <i>P</i> 2 <sub>1</sub> / <i>c</i>                                                             | <i>P</i> $\bar{1}$                                                                              |
| <i>a</i> [Å]                                   | 11.4697(13)                                                                                    | 10.970(2)                                                                                      | 11.8868(11)                                                                                     |
| <i>b</i> [Å]                                   | 11.6701(14)                                                                                    | 16.084(3)                                                                                      | 11.8963(11)                                                                                     |
| <i>c</i> [Å]                                   | 13.4425(16)                                                                                    | 20.340(3)                                                                                      | 14.6976(13)                                                                                     |
| $\alpha$ [°]                                   | 86.002(2)                                                                                      | 90.00                                                                                          | 90.589(2)                                                                                       |
| $\beta$ [°]                                    | 66.152(2)                                                                                      | 114.546(7)                                                                                     | 94.010(2)                                                                                       |
| $\gamma$ [°]                                   | 68.286(2)                                                                                      | 90.00                                                                                          | 98.338(3)                                                                                       |
| <i>V</i> [Å <sup>-3</sup> ]                    | 1522.1(3)                                                                                      | 3264.5(10)                                                                                     | 2050.9(3)                                                                                       |
| <i>T</i> [K]                                   | 296(2)                                                                                         | 296(2)                                                                                         | 173(2)                                                                                          |
| <i>Z</i>                                       | 1                                                                                              | 2                                                                                              | 1                                                                                               |
| $\rho_{\text{calcd}}$ /g cm <sup>-3</sup>      | 1.816                                                                                          | 1.756                                                                                          | 1.641                                                                                           |
| data measured                                  | 10244                                                                                          | 21390                                                                                          | 7136                                                                                            |
| indep reflns                                   | 6969                                                                                           | 7530                                                                                           | 7136                                                                                            |
| <i>R</i> <sub>int</sub>                        | 0.0224                                                                                         | 0.0353                                                                                         | -- (non-merohedral twin)                                                                        |
| reflns with <i>I</i> > 2 $\sigma$ ( <i>I</i> ) | 5565                                                                                           | 5740                                                                                           | 5578                                                                                            |
| parameter                                      | 421                                                                                            | 446                                                                                            | 541                                                                                             |
| restraints                                     | 0                                                                                              | 21                                                                                             | 0                                                                                               |
| <i>R</i> <sub>1</sub> , <i>wR</i> <sub>2</sub> | 0.0364, 0.0892                                                                                 | 0.0383, 0.0901                                                                                 | 0.0527, 0.1105                                                                                  |
| GOF                                            | 1.019                                                                                          | 1.053                                                                                          | 1.186                                                                                           |
| Largest residuals                              | 1.452, -0.985                                                                                  | 0.959, -0.807                                                                                  | 1.093, -1.972                                                                                   |
| [e Å <sup>-3</sup> ]                           |                                                                                                |                                                                                                |                                                                                                 |

$$R1 = \frac{\sum ||F_o| - |F_c||}{\sum |F_o|}, wR2 = \left\{ \frac{\sum [w(F_o^2 - F_c^2)^2]}{\sum [w(F_o^2)^2]} \right\}^{1/2}$$

**Table S2.** Selected distance [ $\text{\AA}$ ] and angles [ $^\circ$ ] for **1-3**.

|                        | <b>1 (Zn<sub>2</sub> Dy<sub>2</sub>)<sup>a</sup></b> | <b>2 (Mn<sub>2</sub> Dy<sub>2</sub>)<sup>b</sup></b> | <b>3 (Co<sub>2</sub> Dy<sub>2</sub>)<sup>c</sup></b> |
|------------------------|------------------------------------------------------|------------------------------------------------------|------------------------------------------------------|
| M1-O1                  | 2.068(3)                                             | 2.135(3)                                             | 2.131(7)                                             |
| M1-O4                  | 2.071(3)                                             | 2.161(3)                                             | 2.074(7)                                             |
| M1-O5                  | 2.065(3)                                             | 2.127(3)                                             | 2.028(7)                                             |
| M1-N2                  | 2.053(4)                                             | 2.147(3)                                             | 2.079(9)                                             |
| M1-O1 <sup>i</sup>     | 2.301(3)                                             | 2.467(3)                                             | 2.219(7)                                             |
| Dy1-O1                 | 2.393(3)                                             | 2.366(3)                                             | 2.386(7)                                             |
| Dy1-N1                 | 2.450(4)                                             | 2.456(4)                                             | 2.474(8)                                             |
| Dy1-O2                 | 2.153(3)                                             | 2.167(3)                                             | 2.156(7)                                             |
| Dy1-O5                 | 2.299(3)                                             | 2.316(3)                                             | 2.305(6)                                             |
| Dy1-O6                 | 2.520(3)                                             | 2.487(3)                                             | 2.509(7)                                             |
| Dy1-O4                 | 2.316(4)                                             | 2.321(3)                                             | 2.330(7)                                             |
| Dy1-O7                 | 2.488(5)                                             | 2.451(4)                                             | 2.463(9)                                             |
| Dy1-O8                 | 2.478(4)                                             | 2.484(4)                                             | 2.477(8)                                             |
| Dy1-Dy1 <sup>i</sup>   | 6.196(3)                                             | 6.292(4)                                             | 6.163(7)                                             |
| O2-Dy1-N1              | 75.7(3)                                              | 74.8(6)                                              | 75.7(3)                                              |
| O2-Dy1-O6              | 83.9(6)                                              | 83.2(5)                                              | 83.7(2)                                              |
| O6-Dy1-O5              | 64.6(1)                                              | 64.9(9)                                              | 64.1(2)                                              |
| O5-Dy1-O1              | 69.0(5)                                              | 69.8(6)                                              | 69.2(2)                                              |
| O1-Dy1-N1              | 68.4(2)                                              | 68.5(6)                                              | 67.5(2)                                              |
| O6-Dy1-O4 <sup>i</sup> | 88.1(2)                                              | 86.8(8)                                              | 86.8(2)                                              |
| O1-M1-O5               | 80.1(4)                                              | 77.9(5)                                              | 79.7(3)                                              |
| O1-M1-O1 <sup>i</sup>  | 83.0(1)                                              | 83.8(8)                                              | 82.7(3)                                              |
| O1-M1-O10              | 89.3(1)                                              | 98.5(9)                                              | 88.2(3)                                              |
| O1-M1-O4               | 111.0(6)                                             | 116.9(7)                                             | 111.3(3)                                             |
| O5-M1-N2               | 87.9(2)                                              | 85.1(9)                                              | 89.5(3)                                              |

Symmetry code: (a)  $i, -x, -y, -z$ ; (b)  $x, y, z; -x+1/2, y+1/2, -z+1/2; -x, -y, -z; x-1/2, -y-1/2, z-1/2$ ; (c)  $i, -x, -y, -z$ .

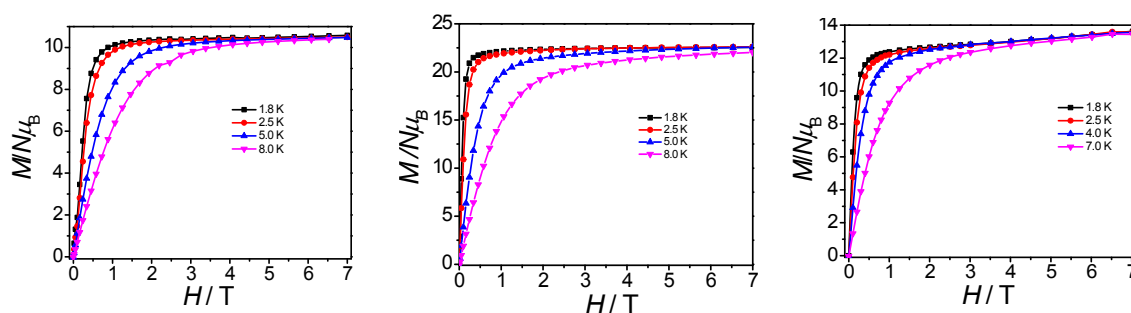**Fig. S1** . Field dependence of the magnetization,  $M$ , at different temperature for complex **1** (left) **2** (middle) and **3** (right).

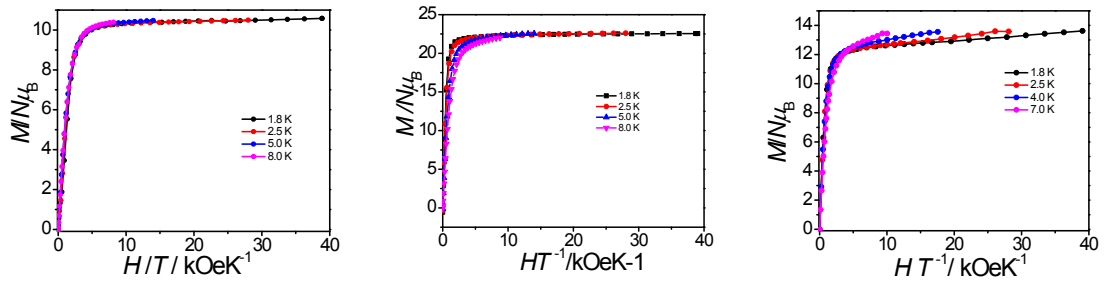

**Fig. S2.** Experimental  $M$  vs.  $H/T$  plots at different temperatures for complex **1** (left), **2** (middle) and **3** (right).

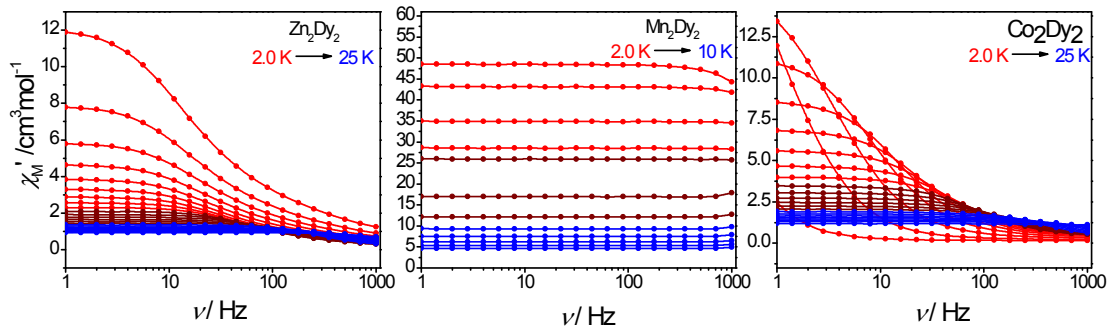

**Fig. S3.** Frequency dependence of in-phase ( $\chi'_M$ ) ac susceptibilities under zero dc field (1-999 Hz, by MPMS Squid VSM) at indicated temperatures for complex **1** (left), complex **2** (middle) and complex **3** (right).

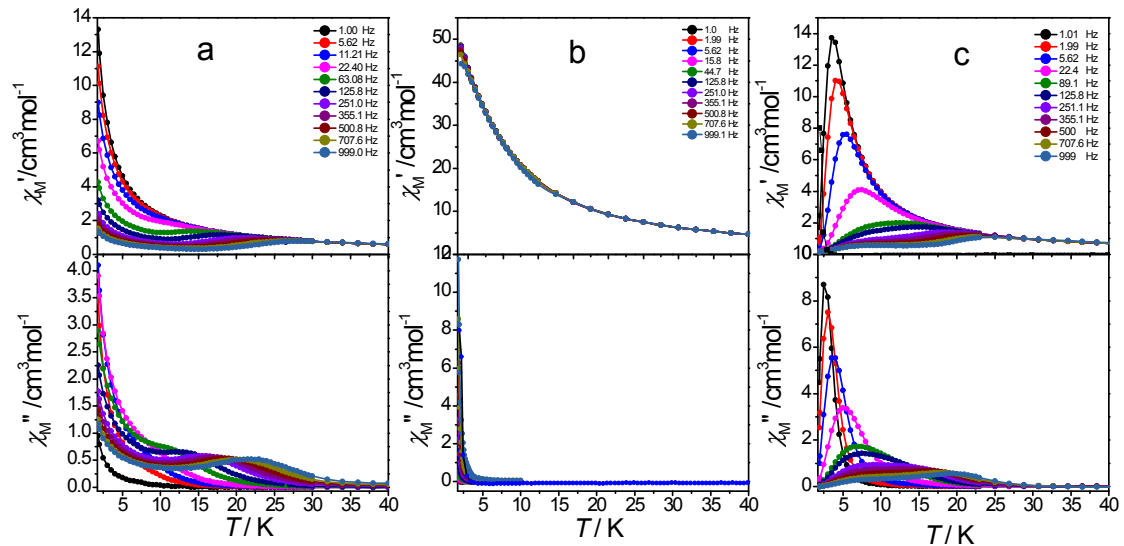

**Fig. S4.** Temperature dependence of in-phase ( $\chi'_M$ ) and out-of-phase ( $\chi''_M$ ) ac susceptibilities under zero dc field (1-999 Hz, by MPMS Squid VSM) at indicated temperatures for complexes **1** (a), **2** (b) and **3** (c).

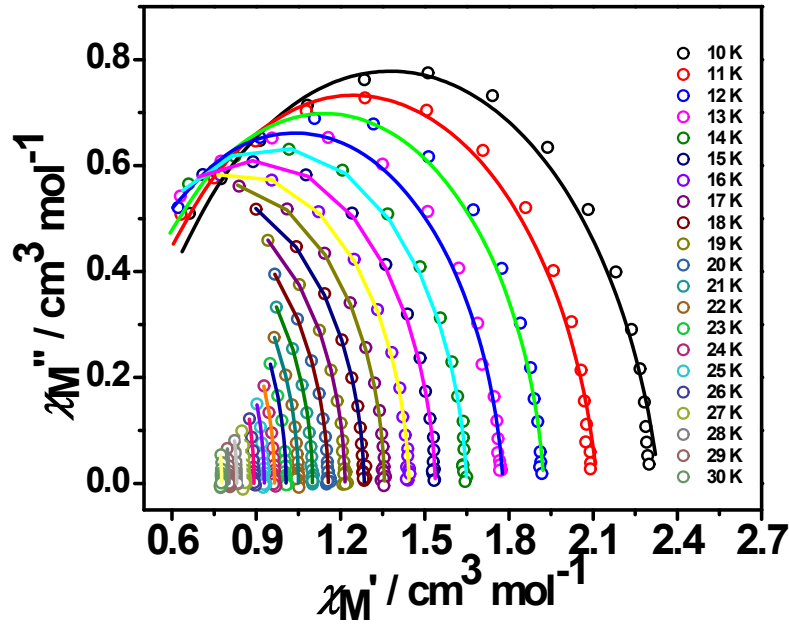

**Fig. S5.** Variable temperature Cole-Cole plots of complex **1** under zero dc field (1-999 Hz, by MPMS Squid VSM). Fitted parameters are compiled in supplementary Table S3.

**Table S3.** Analysis of Cole-Cole plot of complex **1** under zero dc field.

| T    | $\chi_s$     | $\chi_t$     | $\tau$       | $\alpha$     | $R$          |
|------|--------------|--------------|--------------|--------------|--------------|
| 10 K | 0.233452E+01 | 0.420764     | 0.913310E-02 | 0.130631     | 0.203476E-01 |
| 11 K | 0.211440E+01 | 0.380732     | 0.111223E-01 | 0.107042     | 0.128025E-01 |
| 12 K | 0.192439E+01 | 0.363200     | 0.137557E-01 | 0.709362E-01 | 0.381246E-01 |
| 13 K | 0.177897E+01 | 0.299583     | 0.176124E-01 | 0.709294E-01 | 0.353606E-02 |
| 14 K | 0.164978E+01 | 0.274980     | 0.221716E-01 | 0.512202E-01 | 0.194491E-02 |
| 15 K | 0.153771E+01 | 0.242014     | 0.281728E-01 | 0.390024E-01 | 0.984554E-03 |
| 16 K | 0.144427E+01 | 0.210597     | 0.355637E-01 | 0.324423E-01 | 0.576597E-03 |
| 17 K | 0.135643E+01 | 0.188500     | 0.444942E-01 | 0.193296E-01 | 0.492120E-03 |
| 18 K | 0.128454E+01 | 0.142592     | 0.569744E-01 | 0.238841E-01 | 0.410988E-03 |
| 19 K | 0.121621E+01 | 0.123942     | 0.705093E-01 | 0.170176E-01 | 0.375996E-03 |
| 20 K | 0.115624E+01 | 0.103249     | 0.870767E-01 | 0.127869E-01 | 0.279320E-03 |
| 21 K | 0.110032E+01 | 0.817343     | 0.106785     | 0.666913E-02 | 0.116946E-03 |
| 22 K | 0.104986E+01 | 0.519696E-01 | 0.132329     | 0.377118E-02 | 0.269313E-03 |
| 23 K | 0.100585E+01 | 0.215072E-01 | 0.164662     | 0.310139E-02 | 0.218729E-03 |
| 24 K | 0.965114     | 0.387684E-14 | 0.202509     | 0.499554E-02 | 0.218781E-03 |
| 25 K | 0.928476     | 0.456334E-14 | 0.244837     | 0.685372E-02 | 0.261986E-03 |
| 26 K | 0.891963     | 0.255670E-14 | 0.288075     | 0.641754E-15 | 0.121588E-03 |
| 27 K | 0.858794     | 0.329153E-14 | 0.342789     | 0.872076E-15 | 0.390097E-03 |
| 28 K | 0.830292     | 0.449946E-14 | 0.408077     | 0.649119E-15 | 0.239435E-03 |
| 29 K | 0.802523     | 0.572966E-14 | 0.486920     | 0.766481E-15 | 0.173047E-03 |
| 30 K | 0.776499     | 0.768307E-14 | 0.575190     | 0.100719E-14 | 0.277453E-03 |

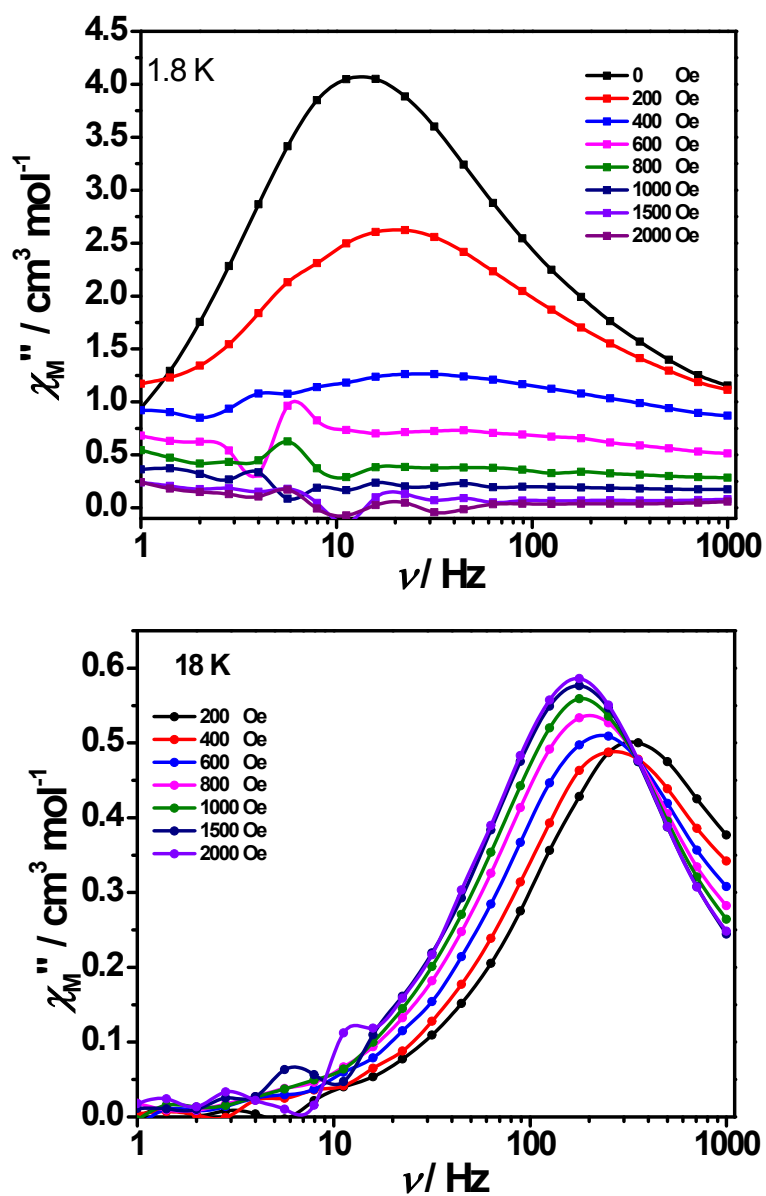

**Fig. S6.** Variable-frequency out-of-phase  $\chi_M''$  components of the ac magnetic susceptibility collected for a microcrystalline sample of **1** (up, at 1.8 K; down, at 18 K) under different applied dc fields.

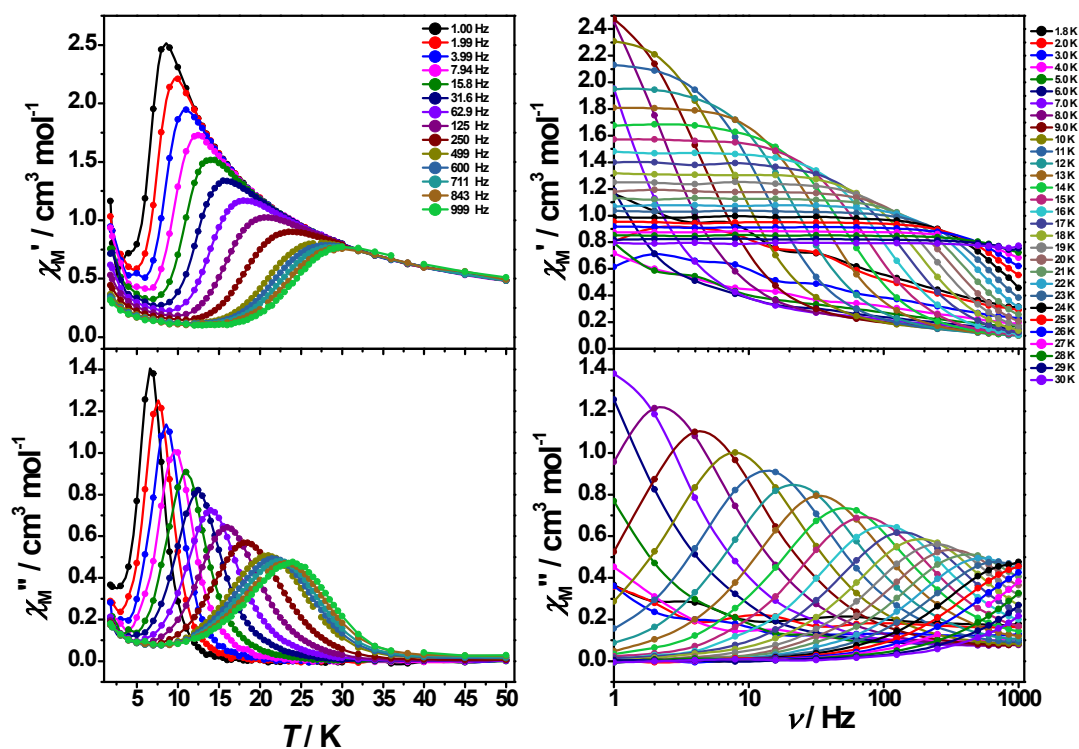

**Fig. S7.** Temperature (left) and frequency (right) dependence of in-phase ( $\chi_M'$ ) and out-of-phase ( $\chi_M''$ ) ac susceptibilities applied 1000 Oe dc field (1-999 Hz, by MPMS Squid VSM) at indicated temperatures for complex **1**.

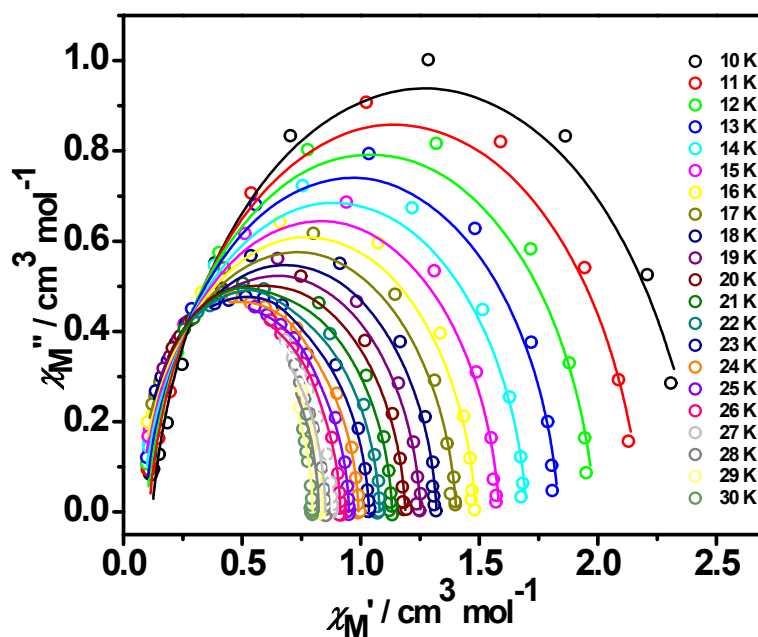

**Fig. S8.** Variable temperature Cole-Cole plots of complex **1** in the dc field of 1000 Oe (1-999 Hz, by MPMS Squid VSM). Fitted parameters are compiled in supplementary Table S4.

**Table S4.** Analysis of Cole-Cole plot of complex **1** under 1000 Oe dc field.

| T    | $\chi_s$     | $\chi_t$     | $\tau$       | $\alpha$     | R            |
|------|--------------|--------------|--------------|--------------|--------------|
| 10 K | 0.120528     | 0.241688E+01 | 0.193704E-01 | 0.956568E-01 | 0.173544E-01 |
| 11 K | 0.106855     | 0.217930E+01 | 0.113254E-01 | 0.859617E-01 | 0.131947E-01 |
| 12 K | 0.967975E-01 | 0.198686E+01 | 0.693561E-02 | 0.768687E-01 | 0.109759E-01 |
| 13 K | 0.909207E-01 | 0.183443E+01 | 0.446914E-02 | 0.680684E-01 | 0.888834E-02 |
| 14 K | 0.802680E-01 | 0.169943E+01 | 0.300215E-02 | 0.706548E-01 | 0.617078E-02 |
| 15 K | 0.721284E-01 | 0.158414E+01 | 0.207945E-02 | 0.650753E-01 | 0.526768E-02 |
| 16 K | 0.644832E-01 | 0.148507E+01 | 0.148462E-02 | 0.613962E-01 | 0.422791E-02 |
| 17 K | 0.543530E-01 | 0.140291E+01 | 0.109001E-02 | 0.642485E-01 | 0.297800E-02 |
| 18 K | 0.516186E-01 | 0.132024E+01 | 0.812476E-03 | 0.565906E-01 | 0.178009E-02 |
| 19 K | 0.468300E-01 | 0.125243E+01 | 0.616307E-03 | 0.528309E-01 | 0.182974E-02 |
| 20 K | 0.384377E-01 | 0.118835E+01 | 0.473033E-03 | 0.508631E-01 | 0.156753E-02 |
| 21 K | 0.294567E-01 | 0.113287E+01 | 0.367256E-03 | 0.494545E-01 | 0.130743E-02 |
| 22 K | 0.193949E-01 | 0.108004E+01 | 0.286247E-03 | 0.451786E-01 | 0.113447E-02 |
| 23 K | 0.841788E-02 | 0.103539E+01 | 0.225103E-03 | 0.452799E-01 | 0.643144E-03 |
| 24 K | 0.689153E-15 | 0.991049     | 0.176780E-03 | 0.375115E-01 | 0.777436E-03 |
| 25 K | 0.955277E-15 | 0.950470     | 0.140089E-03 | 0.291330E-01 | 0.917246E-03 |
| 26 K | 0.120055E-14 | 0.914037     | 0.112896E-03 | 0.184911E-01 | 0.680183E-03 |
| 27 K | 0.226604E-14 | 0.878224     | 0.895351E-04 | 0.391397E-14 | 0.108619E-02 |
| 28 K | 0.322103E-14 | 0.850987     | 0.725229E-04 | 0.508117E-14 | 0.756533E-03 |
| 29 K | 0.411508E-14 | 0.823027     | 0.575238E-04 | 0.673320E-14 | 0.102428E-02 |
| 30 K | 0.610333E-14 | 0.796939     | 0.448247E-04 | 0.613247E-14 | 0.162437E-02 |

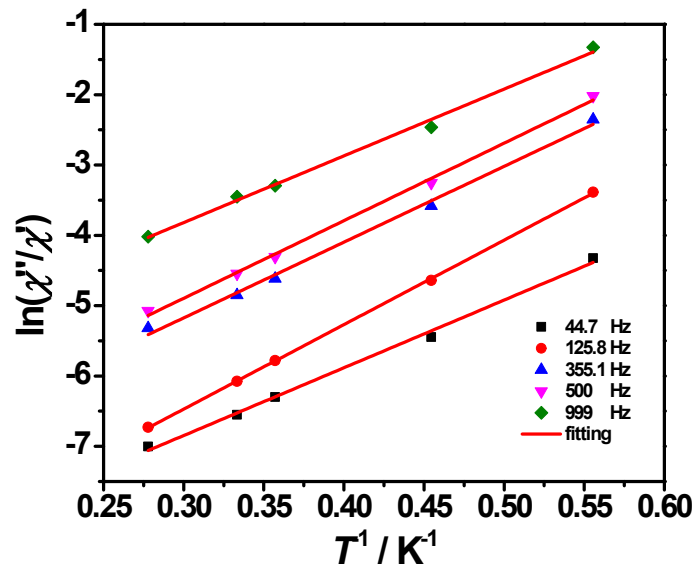**Fig. S9.** (Color online) Natural logarithm of the ratio of  $\chi''$  over  $\chi'$  versus  $T^{-1}$  of the data for complex **2** given in Fig. S4b slope corresponding to activation energy  $E_a = 11$  K.

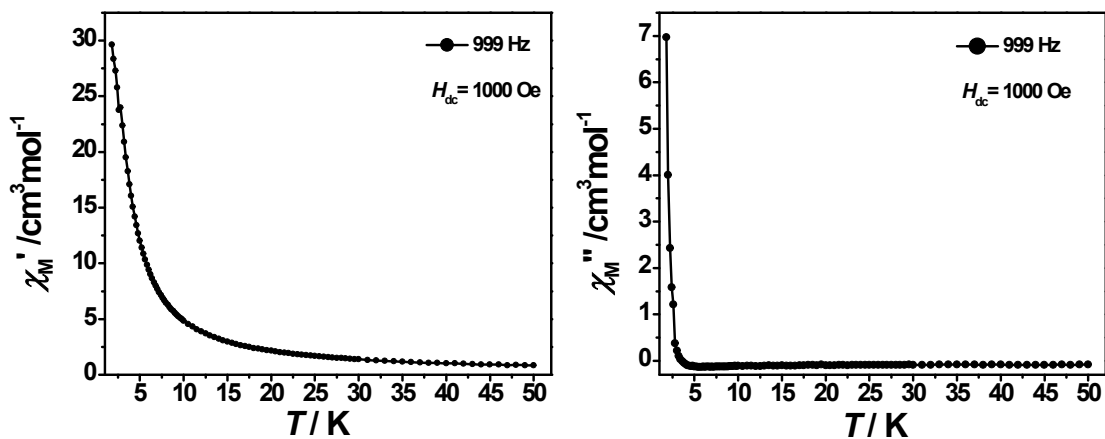

Fig. S10. Temperature dependence of in-phase ( $\chi_M'$ ) and out-of- phase ( $\chi_M''$ ) ac susceptibilities applied 1000 Oe dc field (999 Hz, by MPMS Squid VSM) at indicated temperatures for complex 2.

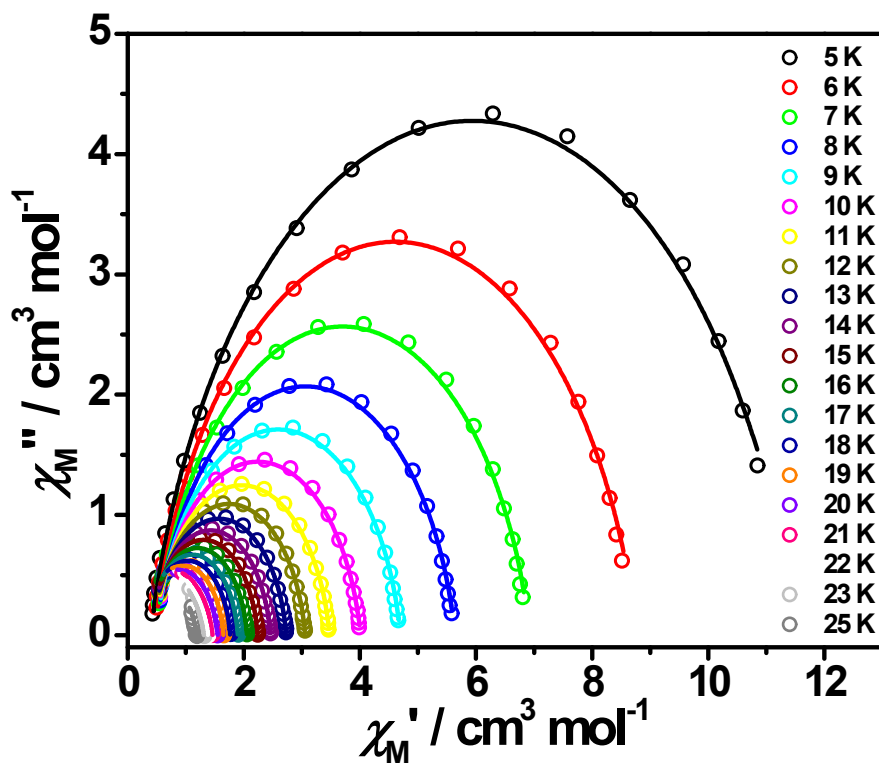

Fig. S11. Variable temperature Cole-Cole plots of complex 3 under zero dc field (1-999 Hz, by MPMS Squid VSM). Fitted parameters are compiled in supplementary Table S5.



**Table S5.** Analysis of Cole-Cole plot of complex **3** under zero dc field.

| $T$  | $\chi_s$     | $\chi_t$     | $\tau$       | $\alpha$ | $R$          |
|------|--------------|--------------|--------------|----------|--------------|
| 5 K  | 0.388788     | 0.114834E+02 | 0.178714E-01 | 0.156962 | 0.890101E-01 |
| 6 K  | 0.456164     | 0.876328E+01 | 0.957889E-02 | 0.143435 | 0.649063E-01 |
| 7 K  | 0.483598     | 0.692302E+01 | 0.594537E-02 | 0.135735 | 0.364073E-01 |
| 8 K  | 0.490024     | 0.563776E+01 | 0.407907E-02 | 0.130358 | 0.198027E-01 |
| 9 K  | 0.484861     | 0.469954E+01 | 0.297237E-02 | 0.12447  | 0.111559E-01 |
| 10 K | 0.469669     | 0.401013E+01 | 0.226408E-02 | 0.121180 | 0.491506E-02 |
| 11 K | 0.452777     | 0.347530E+01 | 0.176277E-02 | 0.114134 | 0.255075E-02 |
| 12 K | 0.434142     | 0.305687E+01 | 0.138833E-02 | 0.107711 | 0.171368E-02 |
| 13 K | 0.412863     | 0.273123E+01 | 0.109983E-02 | 0.104510 | 0.138526E-02 |
| 14 K | 0.397243     | 0.245825E+01 | 0.868305E-03 | 0.097029 | 0.201958E-02 |
| 15 K | 0.376997     | 0.223736E+01 | 0.682924E-03 | 0.092330 | 0.198555E-02 |
| 16 K | 0.356971     | 0.205346E+01 | 0.534465E-03 | 0.090135 | 0.250998E-02 |
| 17 K | 0.339510     | 0.189643E+01 | 0.413786E-03 | 0.086216 | 0.283538E-02 |
| 18 K | 0.310853     | 0.176496E+01 | 0.315691E-03 | 0.092413 | 0.277384E-02 |
| 19 K | 0.268096     | 0.165001E+01 | 0.234137E-03 | 0.103480 | 0.287236E-02 |
| 20 K | 0.227279     | 0.154840E+01 | 0.171123E-03 | 0.117296 | 0.210447E-02 |
| 21 K | 0.116849     | 0.146092E+01 | 0.113925E-03 | 0.144329 | 0.155481E-02 |
| 22 K | 0.261660E-10 | 0.138378E+01 | 0.731163E-04 | 0.169687 | 0.142848E-02 |
| 23 K | 0.406133E-10 | 0.131108E+01 | 0.543179E-04 | 0.167916 | 0.149802E-02 |
| 25 K | 0.100922E-09 | 0.118939E+01 | 0.278574E-04 | 0.181507 | 0.296969E-02 |

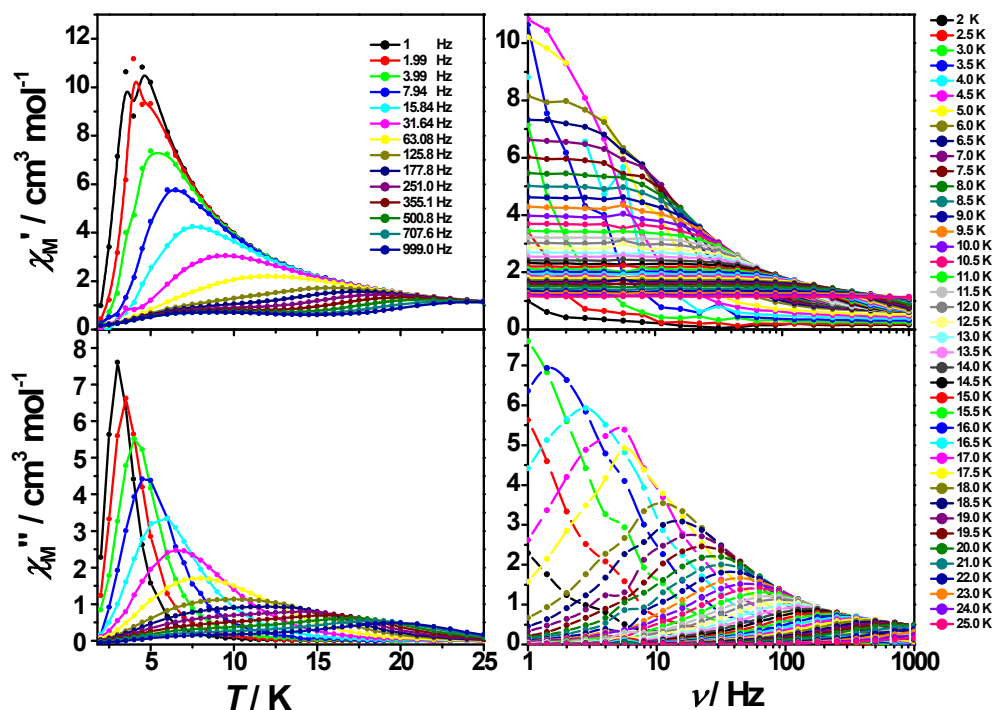**Fig. S12.** Temperature (left) and frequency (right) dependence of in-phase ( $\chi_M'$ ) and out-of-phase ( $\chi_M''$ ) ac susceptibilities applied 1000 Oe dc field (1-999 Hz, by MPMS Squid VSM) at indicated temperatures for complex **3**.

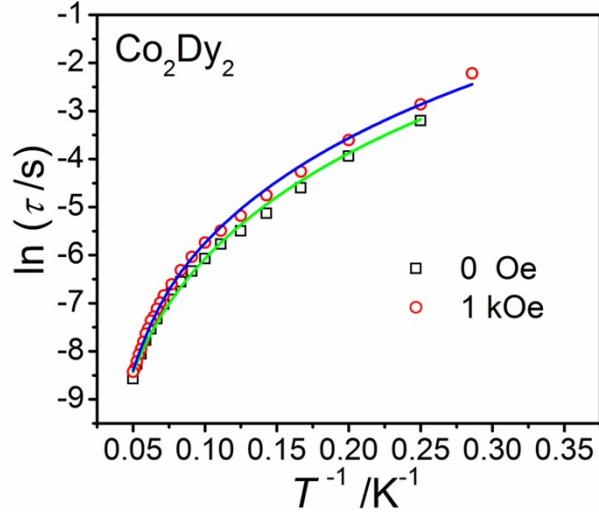

**Fig. S13.** Magnetization relaxation time,  $\ln(\tau)$ , versus  $T^{-1}$  for **3**: the green solid line (under zero dc field) and the blue line (under 1000 Oe dc field) are fitted with the equation  $\tau^{-1} = \tau_{\text{QTM}}^{-1} + CT^n + \tau_0^{-1} \exp(-U_{\text{eff}}/k_B T)$ .

**Table S6.** Parameters used to fit the Arrhenius plots from Fig. 4 and Fig.

S13 using approximations  $\tau^{-1} = \tau_{\text{QTM}}^{-1} + CT^n + \tau_0^{-1} \exp(-U_{\text{eff}}/k_B T)$  (1)

|                                        | 1@1 kOe |         | 3@0 Oe  |        | 3@1 kOe |         |
|----------------------------------------|---------|---------|---------|--------|---------|---------|
|                                        | value   | error   | value   | error  | value   | error   |
| $\tau_{\text{QTM}}^{-1}/\text{s}^{-1}$ | 108.36  | 8.9     | 0.001   | 1e-4   | 1e-15   | -       |
| $C/\text{s}^{-1} \text{K}^{-n}$        | 0.116   | 0.212   | 0.301   | 0.09   | 0.227   | 0.034   |
| $n$                                    | 3.26    | 0.817   | 3.16    | 0.118  | 3.14    | 0.080   |
| $\tau_0/\text{s}$                      | 2.35e-6 | 6.09e-6 | 2.67e-6 | 3.9e-6 | 8.77e-7 | 1.16e-6 |
| $U/\text{K}$                           | 115     | 40      | 125     | 55.7   | 130     | 27.2    |

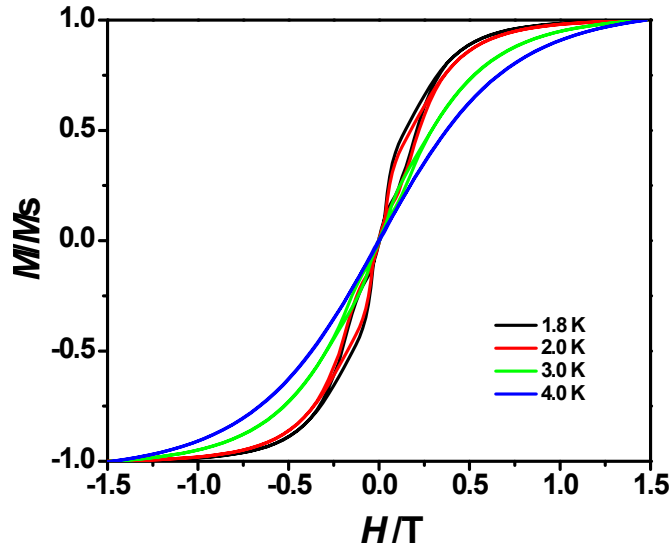

**Fig. S14.** Temperature-dependent magnetic hysteresis loops of **1** below 4 K.

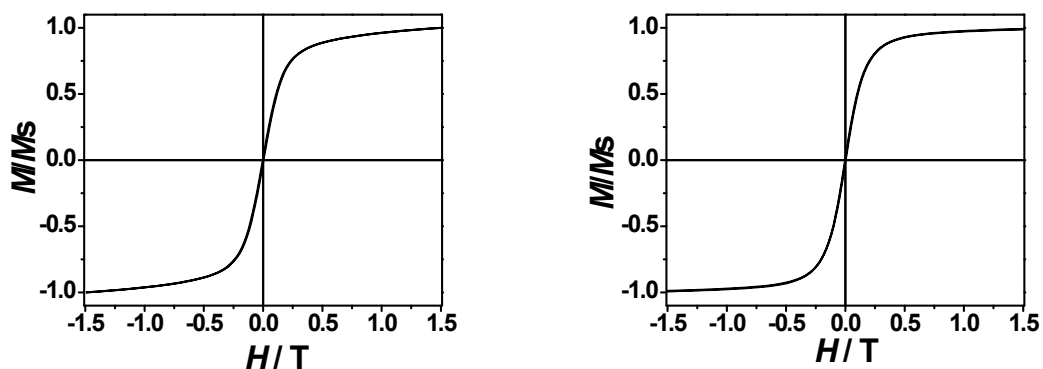

Fig. S15. Temperature-dependent magnetic hysteresis loops of **2** and **3** at 1.8 K.

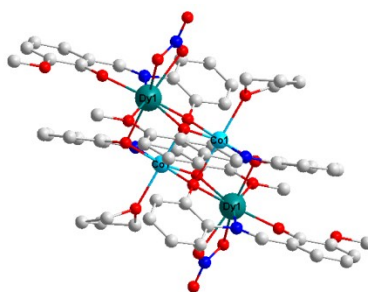

Fig. S16. Complex  $[\text{Co}_2\text{Dy}_2]$  reported by Powell' group.

Table S7. Selected bond length [ $\text{\AA}$ ] for  $[\text{Co}_2\text{Dy}_2]$  complexes reported by Powell and this paper based on Fig. S16.

|                      | $[\text{Co}_2\text{Dy}_2](\text{THF})$ | $[\text{Co}_2\text{Dy}_2](\text{DMF})(\text{complex } \mathbf{3})$ |
|----------------------|----------------------------------------|--------------------------------------------------------------------|
| Dy1-O1               | 2.390                                  | 2.386                                                              |
| Dy1-O2               | 2.155                                  | 2.156                                                              |
| Dy1-O4               | 2.343                                  | 2.330                                                              |
| Dy1-O5               | 2.306                                  | 2.305                                                              |
| Dy1-O6               | 2.518                                  | 2.509                                                              |
| Dy1-O7               | 2.480                                  | 2.477                                                              |
| Dy1-O8               | 2.441                                  | 2.464                                                              |
| Dy1-N1               | 2.454                                  | 2.474                                                              |
| Co1-O1               | 2.077                                  | 2.131                                                              |
| Co1-O1'              | 2.261                                  | 2.219                                                              |
| Co1-O4               | 2.036                                  | 2.074                                                              |
| Co1-O5               | 2.038                                  | 2.028                                                              |
| Co1-O10 <sup>a</sup> | 2.197                                  | 2.060                                                              |
| Co1-N2               | 2.062                                  | 2.079                                                              |

[a]: O10 atoms come from the solvent molecules THF and DMF, respectively.

### Ab initio Calculations for **1**, **2** and **3**

Complete-active-space self-consistent field (CASSCF) calculations on individual lanthanide Dy<sup>III</sup>, Mn<sup>II</sup> ( $S = 5/2$ ) and Co<sup>II</sup> ( $S = 3/2$ ) fragments of complexes **1**, **2** and **3** on the basis of X-ray determined geometry have been carried out with MOLCAS 7.8 program package.<sup>1</sup> During the calculations, the other Dy<sup>III</sup>, Mn<sup>II</sup> and Co<sup>II</sup> ions were replaced by diamagnetic Lu<sup>III</sup>, Zn<sup>II</sup> and Zn<sup>II</sup>, respectively. The basis sets for all atoms are atomic natural orbitals from the MOLCAS ANO-RCC library: ANO-RCC-VTZP for Dy<sup>III</sup>, Mn<sup>II</sup> and Co<sup>II</sup> ions; VTZ for close O and N; VDZ for distant atoms. The calculations employed the second order Douglas-Kroll-Hess Hamiltonian, where scalar relativistic contractions were taken into account in the basis set and the spin-orbit couplings were handled separately in the restricted active space state interaction (RASSI-SO) procedure. For the fragment of Dy<sup>III</sup>, active electrons in 7 active spaces include all f electrons (CAS(9 in 7) in the CASSCF calculation. For Mn<sup>II</sup>, CAS(5 in 5) was used. For Co<sup>II</sup>, CAS(7 in 10) was used. To exclude all the doubts we calculated all the roots in the active space. We have mixed the maximum number of spin-free state which was possible with our hardware (all from 21 sextets, 128 from 224 quadruplets, 130 from 490 doublets for the Dy<sup>III</sup> fragment; all from 1 sextets, 24 quadruplets and 75 doublets for the Mn<sup>II</sup> fragment; all from 10 quadruplets, all from 40 doublets for the Co<sup>II</sup> fragment).

**Table S8.** Lowest Kramers doublets (cm<sup>-1</sup>) and the  $\mathbf{g}$  ( $g_x, g_y, g_z$ ) tensors on the Dy<sup>III</sup>, Mn<sup>II</sup> and Co<sup>II</sup> fragments of **1**, **2** and **3**.

| 1                 |                                | 2                 |                                |                  |                                | 3                 |                                |                  |                                |
|-------------------|--------------------------------|-------------------|--------------------------------|------------------|--------------------------------|-------------------|--------------------------------|------------------|--------------------------------|
| Dy <sup>III</sup> |                                | Dy <sup>III</sup> |                                | Mn <sup>II</sup> |                                | Dy <sup>III</sup> |                                | Co <sup>II</sup> |                                |
| $E$               | $\mathbf{g} (\tilde{S} = 1/2)$ | $E$               | $\mathbf{g} (\tilde{S} = 1/2)$ | $E$              | $\mathbf{g} (\tilde{S} = 5/2)$ | $E$               | $\mathbf{g} (\tilde{S} = 1/2)$ | $E$              | $\mathbf{g} (\tilde{S} = 1/2)$ |
| 0.0               | 0.006<br>0.008<br>19.705       | 0.0               | 0.006<br>0.008<br>19.696       | 0.0              | 2.002<br>2.002<br>2.002        | 0.0               | 0.004<br>0.006<br>19.686       | 0.0              | 1.600<br>2.333<br>7.599        |
| 229.1             | 0.084<br>0.133<br>16.873       | 202.4             | 0.307<br>0.477<br>16.689       | 0.7              |                                | 206.6             | 0.462<br>1.146<br>16.237       | 140.0            | 2.226<br>2.394<br>5.344        |
| 384.0             | 2.231<br>3.847<br>14.420       | 292.0             | 0.960<br>1.390<br>17.962       | 1.8              |                                | 266.9             | 0.003<br>1.293<br>17.712       | 827.6            | 0.987<br>3.217<br>5.560        |
| 444.4             | 8.570<br>5.024<br>1.311        | 374.8             | 0.910<br>3.590<br>11.516       |                  |                                | 379.2             | 0.973<br>4.398<br>11.611       |                  |                                |
| 521.9             | 1.615<br>3.224<br>16.204       | 422.9             | 2.594<br>3.009<br>15.748       |                  |                                | 402.5             | 0.139<br>5.183<br>10.775       |                  |                                |
| 564.3             | 2.344<br>3.667<br>11.590       | 488.2             | 2.072<br>3.727<br>12.734       |                  |                                | 486.3             | 2.829<br>4.801<br>10.896       |                  |                                |
| 637.4             | 0.855<br>1.271<br>16.278       | 551.5             | 0.674<br>0.953<br>16.543       |                  |                                | 559.8             | 1.145<br>1.639<br>15.810       |                  |                                |

|       |        |       |        |  |  |       |        |  |  |
|-------|--------|-------|--------|--|--|-------|--------|--|--|
| 714.9 | 0.070  | 663.5 | 0.065  |  |  | 633.3 | 0.267  |  |  |
|       | 0.104  |       | 0.274  |  |  |       | 0.342  |  |  |
|       | 19.102 |       | 18.896 |  |  |       | 19.443 |  |  |

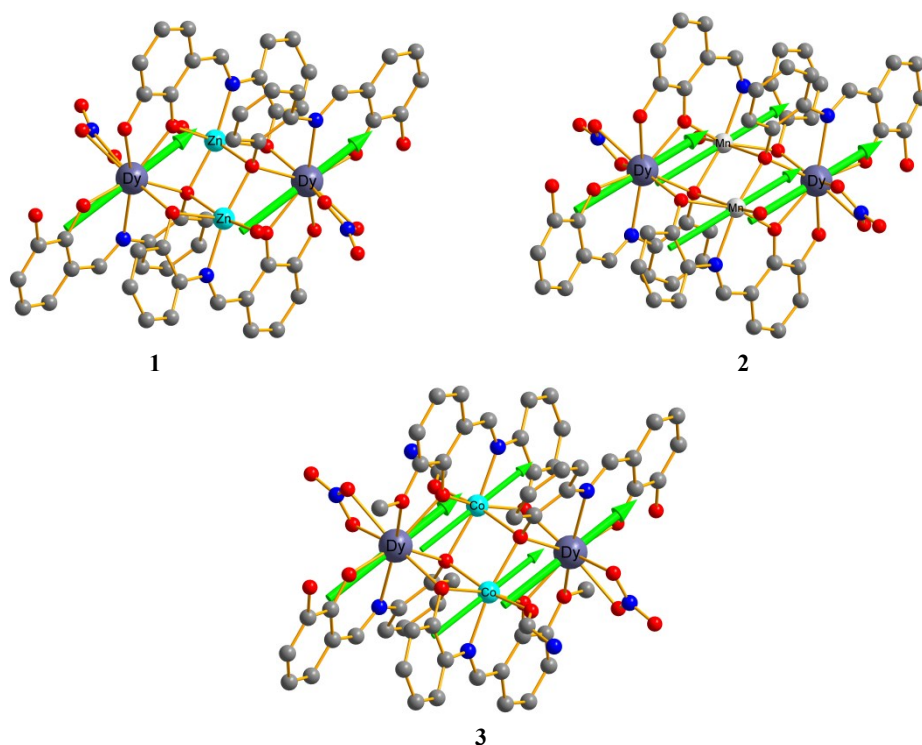

**Fig. S17.** Orientations of the local main magnetic axes of the ground doublets on magnetic center ions of **1**, **2** and **3**.

### Fitting the exchange interaction in four complexes using Lines model based on CASSCF results

To fit the exchange interactions in four complexes, we took two steps to obtain them. Firstly, we calculated the mononuclear fragments using CASSCF to obtain the corresponding magnetic properties (see the first part). And then, the exchange interaction between the magnetic centers is considered within the Lines model,<sup>12</sup> while the account of the dipole-dipole magnetic coupling is treated exactly. The Lines model is effective and has been successfully used widely in the research field of 3d-4f single-molecule magnets.<sup>13</sup>

For complex **1**, the exchange Hamiltonian is:

$$\hat{H}_{exch} = -J_{Dy-Dy}^{total} \hat{S}_{Dy_1} \hat{S}_{Dy_2} \quad (S1)$$

For **2**, it is:

$$\hat{H}_{exch} = -J_{Dy-Mn}^{total} (\hat{S}_{Dy_1} \hat{S}_{Mn_1} + \hat{S}_{Dy_1} \hat{S}_{Mn_2} + \hat{S}_{Dy_2} \hat{S}_{Mn_1} + \hat{S}_{Dy_2} \hat{S}_{Mn_2}) - J_{Mn-Mn}^{total} \hat{S}_{Mn_1} \hat{S}_{Mn_2} - J_{Dy-Dy}^{total} \hat{S}_{Dy_1} \hat{S}_{Dy_2} \quad (S2)$$

For **3**, it is:

$$\hat{H}_{exch} = -J_{Dy-Co}^{total} (\hat{S}_{Dy_1} \hat{S}_{Co_1} + \hat{S}_{Dy_1} \hat{S}_{Co_2} + \hat{S}_{Dy_2} \hat{S}_{Co_1} + \hat{S}_{Dy_2} \hat{S}_{Co_2}) - J_{Co-Co}^{total} \hat{S}_{Co_1} \hat{S}_{Co_2} - J_{Dy-Dy}^{total} \hat{S}_{Dy_1} \hat{S}_{Dy_2} \quad (S3)$$

The  $J_{Dy-Mn}^{total}$ ,  $J_{Mn-Mn}^{total}$ ,  $J_{Dy-Co}^{total}$  and  $J_{Dy-Dy}^{total}$  are parameters of the total magnetic interaction ( $J^{total} =$

$J_{dipolar} + J_{exchange}$ ) between magnetic center ions. The  $\mathcal{S}_{Dy} = 1/2$  and  $\mathcal{S}_{Co} = 1/2$  is the ground pseudospin on the Dy and Co site, respectively, and the  $\mathcal{S}_{Mn} = 5/2$  is the pseudospin of the Mn site. The dipolar magnetic coupling can be calculated exactly, while the exchange coupling constants were fitted through comparison of the computed and measured magnetic susceptibility and molar magnetization using the POLY\_ANISO program.<sup>14</sup>

**Table S9.** Calculated energies (cm<sup>-1</sup>), the corresponding tunneling gaps (cm<sup>-1</sup>) and the  $g_z$  values of the low-lying exchange doublet states of complexes **1**, **2** and **3**.

| <b>1</b> |                |        | <b>2</b> |                |        | <b>3</b> |                |        |
|----------|----------------|--------|----------|----------------|--------|----------|----------------|--------|
| $E$      | $\Delta_{tun}$ | $g_z$  | $E$      | $\Delta_{tun}$ | $g_z$  | $E$      | $\Delta_{tun}$ | $g_z$  |
| 0.00     | 1.87E-07       | 39.410 | 0.00     | 8.32E-08       | 55.725 | 0.00     | 9.48E-10       | 52.082 |
| 0.40     | 1.46E-07       | 0.000  | 0.56     | 1.44E-07       | 53.701 | 8.74     | 4.20E-07       | 0.000  |
|          |                |        | 0.79     | 1.32E-08       | 52.564 | 8.91     | 5.05E-07       | 0.000  |
|          |                |        | 1.05     | 2.53E-08       | 51.158 | 10.22    | 1.01E-05       | 0.000  |
|          |                |        | 1.19     | 9.27E-08       | 54.741 | 10.30    | 2.0E-06        | 39.333 |
|          |                |        | 1.59     | 1.12E-07       | 44.400 | 11.11    | 2.9E-07        | 39.524 |
|          |                |        | 1.63     | 2.42E-08       | 50.197 | 13.54    | 1.1E-07        | 0.000  |
|          |                |        | 2.11     | 1.14E-07       | 47.866 | 15.74    | 3.0E-06        | 29.322 |
|          |                |        | 2.13     | 1.07E-07       | 50.839 |          |                |        |
|          |                |        | 2.47     | 3.86E-07       | 39.902 |          |                |        |
|          |                |        | 2.81     | 9.76E-08       | 43.428 |          |                |        |
|          |                |        | 3.15     | 4.36E-08       | 46.232 |          |                |        |
|          |                |        | 3.33     | 6.88E-08       | 46.233 |          |                |        |
|          |                |        | 3.53     | 3.21E-07       | 41.472 |          |                |        |
|          |                |        | 3.73     | 8.71E-07       | 38.571 |          |                |        |
|          |                |        | 3.76     | 2.84E-07       | 40.439 |          |                |        |
|          |                |        | 4.72     | 3.71E-07       | 0.103  |          |                |        |
|          |                |        | 4.76     | 6.46E-06       | 0.102  |          |                |        |
|          |                |        | 4.76     | 5.61E-06       | 38.927 |          |                |        |
|          |                |        | 4.83     | 4.33E-07       | 37.913 |          |                |        |
|          |                |        | 5.02     | 6.47E-07       | 38.957 |          |                |        |
|          |                |        | 5.12     | 9.70E-06       | 39.187 |          |                |        |
|          |                |        | 5.15     | 2.21E-06       | 0.008  |          |                |        |
|          |                |        | 5.20     | 5.58E-06       | 35.370 |          |                |        |
|          |                |        | 5.30     | 3.22E-07       | 41.448 |          |                |        |
|          |                |        | 5.31     | 2.81E-07       | 0.015  |          |                |        |
|          |                |        | 5.42     | 5.13E-07       |        |          |                |        |
|          |                |        | 5.74     | 3.43E-07       |        |          |                |        |
|          |                |        | 5.90     | 2.13E-07       |        |          |                |        |
|          |                |        | 6.03     | 5.50E-08       |        |          |                |        |

|  |  |  |       |          |  |  |  |  |
|--|--|--|-------|----------|--|--|--|--|
|  |  |  | 6.06  | 3.01E-07 |  |  |  |  |
|  |  |  | 6.18  | 1.32E-06 |  |  |  |  |
|  |  |  | 6.24  | 2.22E-07 |  |  |  |  |
|  |  |  | 6.35  | 2.04E-06 |  |  |  |  |
|  |  |  | 6.53  | 5.53E-08 |  |  |  |  |
|  |  |  | 6.62  | 4.04E-07 |  |  |  |  |
|  |  |  | 6.72  | 3.17E-07 |  |  |  |  |
|  |  |  | 6.80  | 2.57E-07 |  |  |  |  |
|  |  |  | 6.92  | 3.42E-07 |  |  |  |  |
|  |  |  | 6.97  | 4.24E-07 |  |  |  |  |
|  |  |  | 7.09  | 4.98E-07 |  |  |  |  |
|  |  |  | 7.10  | 3.58E-07 |  |  |  |  |
|  |  |  | 7.15  | 2.22E-09 |  |  |  |  |
|  |  |  | 7.23  | 6.62E-08 |  |  |  |  |
|  |  |  | 7.36  | 5.34E-07 |  |  |  |  |
|  |  |  | 7.44  | 7.55E-07 |  |  |  |  |
|  |  |  | 7.46  | 4.97E-07 |  |  |  |  |
|  |  |  | 7.51  | 1.00E-07 |  |  |  |  |
|  |  |  | 7.56  | 1.22E-07 |  |  |  |  |
|  |  |  | 7.68  | 5.04E-07 |  |  |  |  |
|  |  |  | 7.72  | 1.65E-07 |  |  |  |  |
|  |  |  | 7.74  | 1.22E-06 |  |  |  |  |
|  |  |  | 7.76  | 1.07E-06 |  |  |  |  |
|  |  |  | 7.81  | 4.58E-07 |  |  |  |  |
|  |  |  | 8.17  | 4.05E-07 |  |  |  |  |
|  |  |  | 8.18  | 5.42E-07 |  |  |  |  |
|  |  |  | 8.24  | 1.62E-07 |  |  |  |  |
|  |  |  | 8.42  | 4.84E-07 |  |  |  |  |
|  |  |  | 8.46  | 2.07E-07 |  |  |  |  |
|  |  |  | 8.60  | 2.86E-07 |  |  |  |  |
|  |  |  | 8.73  | 3.68E-07 |  |  |  |  |
|  |  |  | 8.95  | 1.53E-07 |  |  |  |  |
|  |  |  | 8.97  | 2.46E-07 |  |  |  |  |
|  |  |  | 9.01  | 3.17E-07 |  |  |  |  |
|  |  |  | 9.15  | 3.06E-07 |  |  |  |  |
|  |  |  | 9.60  | 7.97E-08 |  |  |  |  |
|  |  |  | 9.69  | 1.35E-07 |  |  |  |  |
|  |  |  | 9.85  | 4.07E-08 |  |  |  |  |
|  |  |  | 10.49 | 1.32E-08 |  |  |  |  |
|  |  |  | 10.76 | 1.57E-08 |  |  |  |  |
|  |  |  | 11.29 | 8.29E-10 |  |  |  |  |

|  |  |  |       |          |  |  |  |  |
|--|--|--|-------|----------|--|--|--|--|
|  |  |  | 12.30 | 3.69E-10 |  |  |  |  |
|--|--|--|-------|----------|--|--|--|--|

**Table S10.** Parameters used to fit the Arrhenius plots from Fig. 6 using approximations  $\tau^{-1} = \tau_{\text{QTM}}^{-1} + CT^n$  (Eq. 2).

|                                        | 1@0 Oe  |         | 1@1 kOe |        | 3@0 Oe |        | 3@1 kOe |        |
|----------------------------------------|---------|---------|---------|--------|--------|--------|---------|--------|
|                                        | value   | error   | value   | error  | value  | error  | value   | error  |
| $\tau_{\text{QTM}}^{-1}/\text{s}^{-1}$ | 144.28  | 15.979  | 0       | 46.6   | 50     | 0      | 0       | 0      |
| $C/\text{s}^{-1} \text{K}^{-n}$        | 0.00399 | 0.00125 | 0.00122 | 7.8e-4 | 0.01   | 0.0039 | 0.005   | 0.0015 |
| n                                      | 4.56    | 0.10    | 4.799   | 0.198  | 4.37   | 0.1    | 4.54    | 0.089  |

### References:

- (1) Karlstrom, G.; Lindh, R.; Malmqvist, P. A.; Roos, B. O.; Ryde, U.; Veryazov, V.; Widmark, P. O.; Cossi, M.; Schimmelpfennig, B.; Neogrady, P.; Seijo, L. MOLCAS: a Program Package for Computational Chemistry. *Comput. Mater. Sci.* **2003**, *28*, 222-239.
- (2) Neese, F. ORCA—an *ab initio*, density functional and semiempirical program package, version 2.9.1; Max-Planck institute for bioinorganic chemistry: Mülheim an der Ruhr, Germany, 2012.
- (3) Becke, A. D. *J. Chem. Phys.* **1993**, *98*, 5648-5652.
- (4) Becke, A. D. *Phys. Rev. A.* **1988**, *38*, 3098-3100.
- (5) Lee, C.; Yang, W.; Parr R. G., *Phys. Rev. B.* **1988**, *37*, 785-789.
- (6) Schäfer, A.; Horn, H.; Ahlrichs, R. *J. Chem. Phys.* **1992**, *97*, 2571-2577.
- (7) Schäfer, A.; Huber, C.; Ahlrichs, R. *J. Chem. Phys.* **1994**, *100*, 5829-5835.
- (8) Vieru, V.; Ungur, L.; Chibotaru, L. F. *J. Phys. Chem. Lett.* **2013**, *4*, 3565-3569.
- (9) Noodleman, L. *J. Chem. Phys.* **1981**, *74*, 5737-5743.
- (10) Noodleman, L.; Baerends, E. J. *J. Am. Chem. Soc.* **1984**, *106*, 2316-2327.
- (11) Noodleman, L.; Case, D. A. *Adv. Inorg. Chem.* 1992, *38*, 423-458.
- (12) Lines, M. E. *J. Chem. Phys.* **1971**, *55*, 2977-2984.
- (13) (a) Mondal, K. C.; Sundt, A.; Lan, Y.; Kostakis, G. E.; Waldmann, O.; Ungur, L.; Chibotaru, L. F.; Anson, C. E.; Powell, A. K. *Angew. Chem. Int. Ed.* **2012**, *51*, 7550-7554;. (b) Langley, S. K.; Wielechowski, D. P.; Vieru, V.; Chilton, N. F.; Moubaraki, B.; Abrahams, B. F.; Chibotaru, L. F.; Murray, K. S. *Angew. Chem. Int. Ed.* **2013**, *52*, 12014-12019;
- (14) (a) Chibotaru, L. F.; Ungur, L.; Soncini, A. *Angew. Chem. Int. Ed.* **2008**, *47*, 4126-4129. (b) Ungur, L.; Van W.; Heuvel, d.; Chibotaru, L. F. *New J. Chem.* **2009**, *33*, 1224-1230. (c) Chibotaru, L. F.; Ungur, L.; Aronica, Ch.; Elmoll, H.; Pilet, G.; Luneau, D. *J. Am. Chem. Soc.* **2008**, *130*, 12445-12455.;
